# Supplementary material
Source: ML conference proceedings conference paper supplement (https://openaccess.thecvf.com/content/CVPR2026/html/Yang_SparseOIT_Improving_Order-Independent_CVPR_2026_paper.html)
Supplement: Supplementary file 1 [file Yang_SparseOIT_Improving_Order-Independent_CVPR_2026_supplemental.pdf]

# SparseOIT: Improving Order-Independent Transparency 3DGS via Active Set Method

## Supplementary Material

### A. Details of Rasterizer with Pre-rendering

In this section, we present the details of the Rasterizer with pre-rendering as Alg. 2. The "BAN" means blend and normalize function. The "BAU" means blend and update function. It is worth noting that the sorting step only orders entries by tile ID and the blending process is independent of the depth order of the Gaussians.

---

#### Algorithm 2 GPU software rasterization of 3D Gaussians

---

**Require:**  $w, h$ ; Gaussian means  $M$  and covariances  $S$ ; colors  $C$  and opacities  $A$ ; view  $V$

**Ensure:** Rendered image  $I$ , pre-rendered image  $I^{\text{pre}}$

```

1: CullGaussian( $p, V$ )
2:  $M', S' \leftarrow$  ScreenspaceGaussians( $M, S, V$ )
3:  $T \leftarrow$  CreateTiles( $w, h$ )
4:  $L, K \leftarrow$  DuplicateWithKeys( $M', T$ )
5: SortByKeys( $K, L$ ) ▷ Sort Only in Tile
6:  $R \leftarrow$  IdentifyTileRanges( $T, K$ )
7:  $I \leftarrow 0$ 
8: for all tiles  $t$  in  $T$  do
9:   for all pixels  $i$  in  $t$  do
10:      $r \leftarrow$  GetTileRange( $R, t$ )
11:      $I[i] \leftarrow$  BAN( $i, L, r, K, M', S', C, A, I^{\text{pre}}[i]$ )
12:      $I^{\text{pre}}[i] \leftarrow$  BAU( $i, L, r, K, M', S', C, A, I^{\text{pre}}[i]$ )
13: return  $I$ 

```

---

### B. Details of Backward Propagation

In this section, we present the derivation of the backward propagation of SparseOIT. We rewrite the Eq. 7 as:

$$\mathbf{C} = T\mathbf{c}_0 + (1 - T)F,$$

$$F = \frac{P}{Q}, \quad P = \sum_{i=1}^N \mathbf{c}_i \alpha_i w_i, \quad Q = \sum_{i=1}^N \alpha_i w_i, \quad (9)$$

Therefore, we can get the gradient of  $\frac{\partial \mathbf{C}}{\partial \mathbf{c}_i}$ ,  $\frac{\partial \mathbf{C}}{\partial \alpha_i}$ , and  $\frac{\partial \mathbf{C}}{\partial w_i}$  as:

$$\frac{\partial \mathbf{C}}{\partial \mathbf{c}_i} = (1 - T) \frac{\alpha_i w_i}{Q},$$

$$\frac{\partial \mathbf{C}}{\partial \alpha_i} = \frac{T}{1 - \alpha_i} (F - \mathbf{c}_0) + (1 - T) \frac{w_i}{Q} (\mathbf{c}_i - F), \quad (10)$$

$$\frac{\partial \mathbf{C}}{\partial w_i} = (1 - T) \frac{\alpha_i}{Q} (\mathbf{c}_i - F).$$

From the backward propagation equation, we observe that the variables of each Gaussian are mutually independent.

Therefore, we can apply the backward propagation with recursive Per-Splat parallelization strategy described in Sec. 4.2, or alternatively adopt the active set method to further accelerate the computation.

### C. Analysis of View Subsampling Number and Update Interval for Active Set

In this section, we analyze the effects of the number of subsampled views and the update interval on the final performance. We conduct the corresponding experiments on the truck scene from the Tanks & Temples dataset based on the SparseOIT-B variant. Tab. 3 and Tab. 4 report the experimental results for the number of subsampled views and the update interval, respectively, where I denotes the update interval and S denotes the number of subsampled views. As shown in Tab. 3, increasing the number of subsampled views consistently leads to higher computational cost, while the rendering quality remains relatively stable with only minor fluctuations. Therefore, we use 30 subsampled views in our experiments, as this setting achieves a favorable trade-off between efficiency and performance. As shown in Tab. 4, the training time generally increases as the update interval becomes longer. This is because a longer update interval slows down the reduction of active 3D Gaussians, resulting in higher computational cost during training. Therefore, we choose 500 as the update interval in most cases. For a few scenes, such as *train*, *room*, and *bonsai*, however, we set the update interval to 600, which exceeds twice the number of training views, to ensure the correct execution of the algorithm.

### D. Detailed Evaluation Metrics

In this section, we further introduce SparseOIT-D, a variant that integrates the CUDA acceleration techniques described in Sec. 4.2, the active set strategy, and the densification strategy from Taming-3DGS [21]. The quantitative results are reported in Tab. 6. In addition, we report per-scene PSNR, SSIM, LPIPS, training time, and the number of 3D Gaussians. Tab. 7, Tab. 8, Tab. 9 present the PSNR, SSIM, and LPIPS metrics for each scene within Mip-NeRF 360, Tanks & Temples, and Deep Blending datasets, respectively. Tab. 10 presents the per-scene training time across the three datasets, and Tab. 11 provides the 3D Gaussian counts.

Table 3. Impact of the number of subsampled views on performance in the truck scene.

| Parameters   | PSNR $\uparrow$ | SSIM $\uparrow$ | LPIPS $\downarrow$ | Time $\downarrow$ | N(k) |
|--------------|-----------------|-----------------|--------------------|-------------------|------|
| I=500, S=10  | 25.48           | 0.8745          | 0.1521             | 464               | 2307 |
| I=500, S=20  | 25.48           | 0.8753          | 0.1514             | 459               | 2285 |
| I=500, S=30  | 25.53           | 0.8753          | 0.1515             | 456               | 2288 |
| I=500, S=40  | 25.56           | 0.8752          | 0.1516             | 460               | 2279 |
| I=500, S=50  | 25.52           | 0.8750          | 0.1518             | 462               | 2290 |
| I=500, S=60  | 25.53           | 0.8753          | 0.1518             | 464               | 2283 |
| I=500, S=70  | 25.55           | 0.8753          | 0.1512             | 477               | 2294 |
| I=500, S=80  | 25.51           | 0.8749          | 0.1524             | 471               | 2282 |
| I=500, S=90  | 25.48           | 0.8748          | 0.1524             | 470               | 2269 |
| I=500, S=100 | 25.55           | 0.8755          | 0.1519             | 472               | 2255 |

Table 4. Impact of the update intervals on performance in the truck scene.

| Parameters   | PSNR $\uparrow$ | SSIM $\uparrow$ | LPIPS $\downarrow$ | Time $\downarrow$ | N(k) |
|--------------|-----------------|-----------------|--------------------|-------------------|------|
| I=500, S=30  | 25.53           | 0.8753          | 0.1515             | 456               | 2288 |
| I=600, S=30  | 25.57           | 0.8755          | 0.1516             | 461               | 2290 |
| I=700, S=30  | 25.51           | 0.8746          | 0.1516             | 455               | 2296 |
| I=800, S=30  | 25.52           | 0.8753          | 0.1523             | 459               | 2261 |
| I=900, S=30  | 25.52           | 0.8754          | 0.1524             | 459               | 2251 |
| I=1000, S=30 | 25.54           | 0.8752          | 0.1518             | 464               | 2275 |
| I=2000, S=30 | 25.52           | 0.8747          | 0.1530             | 480               | 2285 |
| I=3000, S=30 | 25.52           | 0.8750          | 0.1521             | 492               | 2257 |
| I=4000, S=30 | 25.51           | 0.8754          | 0.1517             | 503               | 2265 |
| I=5000, S=30 | 25.58           | 0.8755          | 0.1520             | 516               | 2274 |

## E. Further Analysis and Discussion

From our empirical observations, the outdoor scenes in the Mip-NeRF 360 dataset tend to overfit under the learning rates adopted in the main paper. To further investigate this issue, we additionally conduct experiments with the learning rate of parameter  $v$  reduced to 0.0005, while keeping all other settings unchanged. Following the experimental setting in Sec. D, we further provide both the average results on the Mip-NeRF 360 dataset in Tab. 5 and the detailed per-scene results for the outdoor scenes in Tab. 12 and Tab. 13.

It can be observed that the rendering quality on the outdoor scenes of Mip-NeRF 360 improves substantially. This phenomenon may be due to the fact that the current weight formulation of 3D Gaussians is not sufficiently accurate, which also makes the optimization more difficult. Moreover, the slightly worse performance of the current OIT formulation compared with 3DGS may also stem from the relatively lower quality metrics on the outdoor scenes of the Mip-NeRF 360 dataset.

In addition, empirical results from our initial experiments suggest that the random sampling strategy applied during densification can improve novel view synthesis performance on the evaluation set across multiple scenes, with representative examples including *train*, *drjohnson*, and

*treehill*. This may be attributed to the fact that a larger number of 3D Gaussians makes the scene more prone to overfitting, thereby degrading rendering quality on unseen views.

Table 5. Quantitative results on Mip-NeRF 360 under adjusted learning rate

| Method           | PSNR $\uparrow$ | SSIM $\uparrow$ | LPIPS $\downarrow$ | Time $\downarrow$ | N(k) |
|------------------|-----------------|-----------------|--------------------|-------------------|------|
| 3DGS [15]        | 27.68           | 0.8214          | 0.1771             | 909               | 2679 |
| Taming-3DGS [21] | 27.44           | 0.8012          | 0.2193             | 183               | 665  |
| SortFree [14]    | 27.33           | 0.8067          | 0.1792             | 2302              | 4314 |
| SparseOIT-A      | 27.38           | 0.8058          | 0.1964             | 564               | 2082 |
| SparseOIT-B      | 27.38           | 0.8058          | 0.1973             | 460               | 2094 |
| SparseOIT-C      | 27.11           | 0.7884          | 0.2268             | 201               | 686  |
| SparseOIT-D      | 26.92           | 0.7805          | 0.2377             | 175               | 686  |

Table 6. Comparison with baselines on Tanks & Temples, DeepBlending, and Mip-NeRF datasets.  $N(k)$  denotes the number of Gaussians divided by 1000. Best and second-best results are highlighted in   best,   second best.

| Method           | Tanks & Temples                                       |                                                        |                                                        |                                                     |        | DeepBlending                                          |                                                        |                                                        |                                                     |        | Mip-NeRF 360                                          |                                                        |                                                        |                                                     |        |
|------------------|-------------------------------------------------------|--------------------------------------------------------|--------------------------------------------------------|-----------------------------------------------------|--------|-------------------------------------------------------|--------------------------------------------------------|--------------------------------------------------------|-----------------------------------------------------|--------|-------------------------------------------------------|--------------------------------------------------------|--------------------------------------------------------|-----------------------------------------------------|--------|
|                  | PSNR↑                                                 | SSIM↑                                                  | LPIPS↓                                                 | Time↓                                               | $N(k)$ | PSNR↑                                                 | SSIM↑                                                  | LPIPS↓                                                 | Time↓                                               | $N(k)$ | PSNR↑                                                 | SSIM↑                                                  | LPIPS↓                                                 | Time↓                                               | $N(k)$ |
| 3DGS [15]        | <span style="background-color: #f8d7da;">23.78</span> | <span style="background-color: #f8d7da;">0.8494</span> | <span style="background-color: #f8d7da;">0.1704</span> | 705                                                 | 1569   | 29.70                                                 | 0.9027                                                 | <span style="background-color: #fff3cd;">0.2409</span> | 1213                                                | 2459   | <span style="background-color: #f8d7da;">27.68</span> | <span style="background-color: #f8d7da;">0.8214</span> | <span style="background-color: #f8d7da;">0.1771</span> | 909                                                 | 2679   |
| Taming-3DGS [21] | <span style="background-color: #fff3cd;">23.70</span> | <span style="background-color: #fff3cd;">0.8320</span> | <span style="background-color: #fff3cd;">0.2122</span> | <span style="background-color: #f8d7da;">153</span> | 319    | 29.70                                                 | 0.8992                                                 | <span style="background-color: #fff3cd;">0.2734</span> | <span style="background-color: #fff3cd;">156</span> | 294    | <span style="background-color: #fff3cd;">27.44</span> | <span style="background-color: #fff3cd;">0.8012</span> | <span style="background-color: #fff3cd;">0.2193</span> | <span style="background-color: #fff3cd;">183</span> | 665    |
| SortFree [14]    | 22.97                                                 | 0.8299                                                 | 0.1814                                                 | 2159                                                | 3765   | 29.76                                                 | 0.9016                                                 | <span style="background-color: #f8d7da;">0.2399</span> | 2065                                                | 2843   | 27.33                                                 | <span style="background-color: #fff3cd;">0.8067</span> | <span style="background-color: #fff3cd;">0.1792</span> | 2302                                                | 4314   |
| SparseOIT-A      | 23.63                                                 | 0.8422                                                 | <span style="background-color: #fff3cd;">0.1784</span> | 559                                                 | 2055   | 29.76                                                 | <span style="background-color: #fff3cd;">0.9030</span> | 0.2479                                                 | 355                                                 | 1249   | 27.19                                                 | 0.8019                                                 | 0.2023                                                 | 531                                                 | 2126   |
| SparseOIT-B      | 23.68                                                 | <span style="background-color: #fff3cd;">0.8429</span> | 0.1798                                                 | 445                                                 | 2052   | 29.80                                                 | <span style="background-color: #f8d7da;">0.9043</span> | 0.2486                                                 | 309                                                 | 1251   | 27.21                                                 | 0.8027                                                 | 0.2040                                                 | 408                                                 | 2121   |
| SparseOIT-C      | 23.39                                                 | 0.8206                                                 | 0.2255                                                 | 160                                                 | 319    | <span style="background-color: #f8d7da;">29.87</span> | 0.9010                                                 | 0.2692                                                 | 159                                                 | 295    | 26.98                                                 | 0.7802                                                 | 0.2394                                                 | 191                                                 | 686    |
| SparseOIT-D      | 23.34                                                 | 0.8143                                                 | 0.2374                                                 | <span style="background-color: #fff3cd;">159</span> | 319    | <span style="background-color: #f8d7da;">29.84</span> | 0.8993                                                 | 0.2783                                                 | <span style="background-color: #f8d7da;">150</span> | 295    | 26.84                                                 | 0.7737                                                 | 0.2500                                                 | <span style="background-color: #f8d7da;">170</span> | 686    |

Table 7. PSNR scores of our method on the Mip-NeRF 360 dataset, the Tanks & Temples dataset, and the Deep Blending dataset.

| Method           | Mip-NeRF 360 |         |        |       |          |       |         |         |        |       | Tanks & Temples |           | Deep Blending |  |
|------------------|--------------|---------|--------|-------|----------|-------|---------|---------|--------|-------|-----------------|-----------|---------------|--|
|                  | bicycle      | flowers | garden | stump | treehill | room  | counter | kitchen | bonsai | truck | train           | drjohnson | playroom      |  |
| 3DGS [15]        | 25.24        | 21.50   | 27.37  | 26.64 | 22.54    | 32.23 | 29.37   | 31.80   | 32.47  | 25.44 | 22.12           | 29.41     | 30.00         |  |
| Taming-3DGS [21] | 24.85        | 21.01   | 27.25  | 25.99 | 22.89    | 32.14 | 28.91   | 31.65   | 32.26  | 25.17 | 22.24           | 29.43     | 29.98         |  |
| SortFree [14]    | 23.89        | 20.58   | 27.07  | 24.75 | 21.09    | 32.90 | 30.30   | 31.90   | 33.45  | 24.58 | 21.36           | 29.51     | 30.00         |  |
| SparseOIT-A      | 23.92        | 20.42   | 26.95  | 24.85 | 22.32    | 32.11 | 29.88   | 31.31   | 32.93  | 25.45 | 21.82           | 29.59     | 29.93         |  |
| SparseOIT-B      | 23.86        | 20.49   | 27.11  | 25.02 | 22.34    | 32.13 | 29.83   | 31.33   | 32.78  | 25.53 | 21.82           | 29.64     | 29.95         |  |
| SparseOIT-C      | 23.53        | 20.11   | 26.95  | 24.64 | 22.40    | 31.87 | 29.36   | 31.21   | 32.74  | 24.95 | 21.85           | 29.56     | 30.18         |  |
| SparseOIT-D      | 23.66        | 20.02   | 26.53  | 24.74 | 22.53    | 31.55 | 29.31   | 30.72   | 32.48  | 24.96 | 21.73           | 29.54     | 30.13         |  |

Table 8. SSIM scores of our method on the Mip-NeRF360 dataset, the Tanks & Temples dataset, and the Deep Blending dataset.

| Method           | Mip-NeRF 360 |         |        |        |          |        |         |         |        |        | Tanks & Temples |           | Deep Blending |  |
|------------------|--------------|---------|--------|--------|----------|--------|---------|---------|--------|--------|-----------------|-----------|---------------|--|
|                  | bicycle      | flowers | garden | stump  | treehill | room   | counter | kitchen | bonsai | truck  | train           | drjohnson | playroom      |  |
| 3DGS [15]        | 0.7647       | 0.6029  | 0.8640 | 0.7714 | 0.6326   | 0.9415 | 0.9176  | 0.9444  | 0.9532 | 0.8810 | 0.8178          | 0.9026    | 0.9028        |  |
| Taming-3DGS [21] | 0.7169       | 0.5531  | 0.8532 | 0.7351 | 0.6227   | 0.9327 | 0.9084  | 0.9406  | 0.9485 | 0.8638 | 0.8002          | 0.8996    | 0.8987        |  |
| SortFree [14]    | 0.7281       | 0.5875  | 0.8570 | 0.7054 | 0.6126   | 0.9448 | 0.9241  | 0.9444  | 0.9563 | 0.8665 | 0.7933          | 0.9012    | 0.9020        |  |
| SparseOIT-A      | 0.6942       | 0.5743  | 0.8492 | 0.7181 | 0.6219   | 0.9430 | 0.9205  | 0.9422  | 0.9534 | 0.8753 | 0.8091          | 0.9040    | 0.9020        |  |
| SparseOIT-B      | 0.6952       | 0.5751  | 0.8504 | 0.7233 | 0.6218   | 0.9429 | 0.9201  | 0.9423  | 0.9531 | 0.8753 | 0.8106          | 0.9050    | 0.9037        |  |
| SparseOIT-C      | 0.6406       | 0.5319  | 0.8379 | 0.6822 | 0.5970   | 0.9336 | 0.9117  | 0.9375  | 0.9495 | 0.8532 | 0.7880          | 0.9006    | 0.9015        |  |
| SparseOIT-D      | 0.6347       | 0.5189  | 0.8220 | 0.6778 | 0.5917   | 0.9299 | 0.9071  | 0.9344  | 0.9466 | 0.8527 | 0.7758          | 0.8985    | 0.9001        |  |

Table 9. LPIPS scores of our method on the Mip-NeRF360 dataset, the Tanks & Temples dataset, and the Deep Blending dataset.

| Method           | Mip-NeRF 360 |         |        |        |          |        |         |         |        |        | Tanks & Temples |           | Deep Blending |  |
|------------------|--------------|---------|--------|--------|----------|--------|---------|---------|--------|--------|-----------------|-----------|---------------|--|
|                  | bicycle      | flowers | garden | stump  | treehill | room   | counter | kitchen | bonsai | truck  | train           | drjohnson | playroom      |  |
| 3DGS [15]        | 0.2105       | 0.3379  | 0.1078 | 0.2153 | 0.3287   | 0.1140 | 0.1143  | 0.0677  | 0.0974 | 0.1428 | 0.1980          | 0.2388    | 0.2429        |  |
| Taming-3DGS [21] | 0.2970       | 0.4088  | 0.1287 | 0.2924 | 0.3892   | 0.1366 | 0.1320  | 0.0759  | 0.1132 | 0.1854 | 0.2390          | 0.2692    | 0.2777        |  |
| SortFree [14]    | 0.2352       | 0.3101  | 0.1142 | 0.2510 | 0.3304   | 0.1081 | 0.1046  | 0.0677  | 0.0916 | 0.1509 | 0.2118          | 0.2364    | 0.2433        |  |
| SparseOIT-A      | 0.3098       | 0.3658  | 0.1332 | 0.2556 | 0.3652   | 0.1116 | 0.1110  | 0.0704  | 0.0983 | 0.1502 | 0.2067          | 0.2474    | 0.2483        |  |
| SparseOIT-B      | 0.3135       | 0.3682  | 0.1351 | 0.2561 | 0.3697   | 0.1126 | 0.1124  | 0.0704  | 0.0978 | 0.1515 | 0.2081          | 0.2487    | 0.2485        |  |
| SparseOIT-C      | 0.3711       | 0.4218  | 0.1559 | 0.3413 | 0.4117   | 0.1351 | 0.1301  | 0.0793  | 0.1082 | 0.2005 | 0.2505          | 0.2633    | 0.2750        |  |
| SparseOIT-D      | 0.3829       | 0.4322  | 0.1836 | 0.3518 | 0.4245   | 0.1420 | 0.1364  | 0.0834  | 0.1132 | 0.2031 | 0.2718          | 0.2750    | 0.2817        |  |

Table 10. Training time of our method on the Mip-NeRF360 dataset, the Tanks & Temples dataset, and the Deep Blending dataset.

| Method           | Mip-NeRF 360 |         |        |       |          |      |         |         |        |       | Tanks & Temples |           | Deep Blending |  |
|------------------|--------------|---------|--------|-------|----------|------|---------|---------|--------|-------|-----------------|-----------|---------------|--|
|                  | bicycle      | flowers | garden | stump | treehill | room | counter | kitchen | bonsai | truck | train           | drjohnson | playroom      |  |
| 3DGS [15]        | 1467         | 975     | 1396   | 1207  | 1082     | 495  | 494     | 621     | 443    | 776   | 634             | 1396      | 1031          |  |
| Taming-3DGS [21] | 206          | 178     | 324    | 156   | 199      | 129  | 144     | 162     | 145    | 144   | 161             | 165       | 147           |  |
| SortFree [14]    | 3423         | 3494    | 3063   | 3251  | 3198     | 1037 | 1159    | 1129    | 965    | 2076  | 2242            | 2640      | 1491          |  |
| SparseOIT-A      | 523          | 500     | 817    | 933   | 497      | 333  | 373     | 430     | 376    | 612   | 505             | 314       | 396           |  |
| SparseOIT-B      | 417          | 411     | 603    | 607   | 409      | 262  | 297     | 363     | 303    | 456   | 434             | 288       | 329           |  |
| SparseOIT-C      | 199          | 170     | 352    | 163   | 201      | 140  | 158     | 176     | 165    | 154   | 166             | 171       | 146           |  |
| SparseOIT-D      | 167          | 164     | 241    | 158   | 176      | 134  | 158     | 175     | 154    | 157   | 162             | 159       | 141           |  |

Table 11. Per-scene 3D Gaussian counts of our method on the Mip-NeRF 360, Tanks & Temples, and Deep Blending datasets, where each value is reported as  $N(k)$ , the number of Gaussians divided by 1000.

| Method           | Mip-NeRF 360 |         |        |       |          | Tanks & Temples |         |         |        | Deep Blending |       |           |          |
|------------------|--------------|---------|--------|-------|----------|-----------------|---------|---------|--------|---------------|-------|-----------|----------|
|                  | bicycle      | flowers | garden | stump | treehill | room            | counter | kitchen | bonsai | truck         | train | drjohnson | playroom |
| 3DGS [15]        | 4876         | 2865    | 4069   | 4327  | 3269     | 1141            | 994     | 1509    | 1064   | 2054          | 1084  | 3076      | 1841     |
| Taming-3DGS [21] | 813          | 575     | 1903   | 480   | 785      | 225             | 311     | 482     | 413    | 272           | 365   | 404       | 185      |
| SortFree [14]    | 6312         | 7296    | 5238   | 6498  | 6269     | 1676            | 2076    | 1872    | 1591   | 3694          | 3835  | 3650      | 2035     |
| SparseOIT-A      | 2293         | 2159    | 3227   | 4204  | 2124     | 1133            | 1310    | 1414    | 1268   | 2275          | 1835  | 1118      | 1380     |
| SparseOIT-B      | 2261         | 2136    | 3232   | 4191  | 2110     | 1140            | 1322    | 1426    | 1271   | 2288          | 1817  | 1118      | 1384     |
| SparseOIT-C      | 814          | 575     | 2081   | 483   | 785      | 225             | 312     | 483     | 413    | 272           | 366   | 404       | 185      |
| SparseOIT-D      | 814          | 575     | 2081   | 483   | 785      | 225             | 311     | 483     | 413    | 272           | 366   | 404       | 185      |

Table 12. PSNR, SSIM and LPIPS scores of our method in the outdoor scenes of Mip-NeRF 360 dataset under adjusted learning rate

| Method           | PSNR    |         |        |       |          | SSIM    |         |        |        |          | LPIPS   |         |        |        |          |
|------------------|---------|---------|--------|-------|----------|---------|---------|--------|--------|----------|---------|---------|--------|--------|----------|
|                  | bicycle | flowers | garden | stump | treehill | bicycle | flowers | garden | stump  | treehill | bicycle | flowers | garden | stump  | treehill |
| 3DGS [15]        | 25.24   | 21.50   | 27.37  | 26.64 | 22.54    | 0.7647  | 0.6029  | 0.8640 | 0.7714 | 0.6326   | 0.2105  | 0.3379  | 0.1078 | 0.2153 | 0.3287   |
| Taming-3DGS [21] | 24.85   | 21.01   | 27.25  | 25.99 | 22.89    | 0.7169  | 0.5531  | 0.8532 | 0.7351 | 0.6227   | 0.2970  | 0.4088  | 0.1287 | 0.2924 | 0.3892   |
| SortFree [14]    | 23.89   | 20.58   | 27.07  | 24.75 | 21.09    | 0.7281  | 0.5875  | 0.8570 | 0.7054 | 0.6126   | 0.2352  | 0.3101  | 0.1142 | 0.2510 | 0.3304   |
| SparseOIT-A      | 24.25   | 20.72   | 27.13  | 25.42 | 22.63    | 0.7239  | 0.5635  | 0.8573 | 0.7247 | 0.6239   | 0.2705  | 0.3734  | 0.1168 | 0.2521 | 0.3638   |
| SparseOIT-B      | 24.35   | 20.78   | 27.13  | 25.44 | 22.65    | 0.7244  | 0.5629  | 0.8570 | 0.7268 | 0.6229   | 0.2720  | 0.3740  | 0.1182 | 0.2518 | 0.3665   |
| SparseOIT-C      | 23.85   | 20.19   | 26.95  | 25.11 | 22.72    | 0.6870  | 0.5199  | 0.8490 | 0.6992 | 0.6080   | 0.3218  | 0.4233  | 0.1304 | 0.3167 | 0.3960   |
| SparseOIT-D      | 23.72   | 20.10   | 26.75  | 25.11 | 22.55    | 0.6748  | 0.5028  | 0.8408 | 0.6914 | 0.5968   | 0.3389  | 0.4376  | 0.1437 | 0.3301 | 0.4142   |

Table 13. Training time and per-scene 3D Gaussian counts of our method in the outdoor scenes of Mip-NeRF 360 dataset under adjusted learning rate

| Method           | Time    |         |        |       |          | N(k)    |         |        |       |          |
|------------------|---------|---------|--------|-------|----------|---------|---------|--------|-------|----------|
|                  | bicycle | flowers | garden | stump | treehill | bicycle | flowers | garden | stump | treehill |
| 3DGS [15]        | 1467    | 975     | 1396   | 1207  | 1082     | 4876    | 2865    | 4069   | 4327  | 3269     |
| Taming-3DGS [21] | 206     | 178     | 324    | 156   | 199      | 813     | 575     | 1903   | 480   | 785      |
| SortFree [14]    | 3423    | 3494    | 3063   | 3251  | 3198     | 6312    | 7296    | 5238   | 6498  | 6269     |
| SparseOIT-A      | 574     | 585     | 908    | 980   | 513      | 2345    | 2198    | 3206   | 3821  | 2041     |
| SparseOIT-B      | 493     | 491     | 731    | 735   | 461      | 2349    | 2177    | 3212   | 3904  | 2043     |
| SparseOIT-C      | 220     | 187     | 383    | 171   | 213      | 814     | 575     | 2081   | 484   | 785      |
| SparseOIT-D      | 177     | 169     | 264    | 156   | 188      | 814     | 575     | 2081   | 484   | 785      |
